# Supplementary material for: An interwoven MoO3@CNT scaffold interlayer for high-performance lithium–sulfur batteries
Source: Royal Society of Chemistry journal article supplement (doi:10.1039/c8ta01726c), 2018-01-01
Supplement: c8ta01726c1.pdf [file c8ta01726c1.pdf]

## Supplementary Information

### Interwoven MoO<sub>3</sub>@CNT Scaffold Interlayer for High-Performance

#### Lithium-Sulfur Batteries

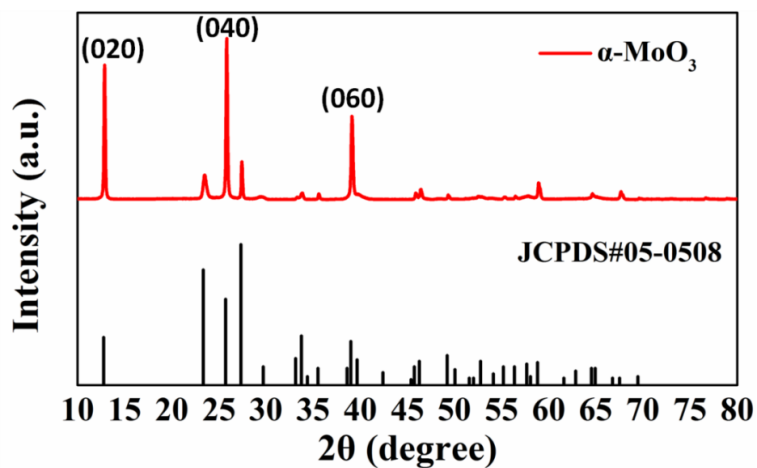

Figure S1. XRD pattern of MoO<sub>3</sub> nanorods.

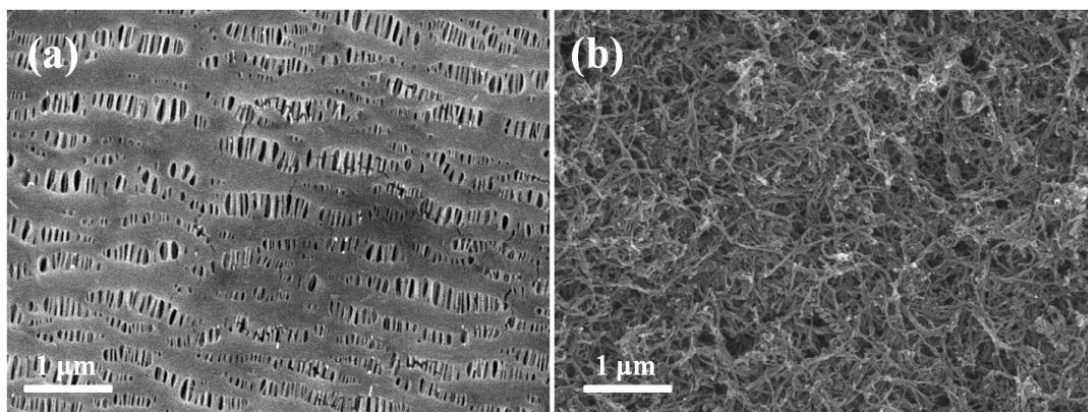

Figure S2. SEM images of original PP separator (a) and CNT decorated separator (b).

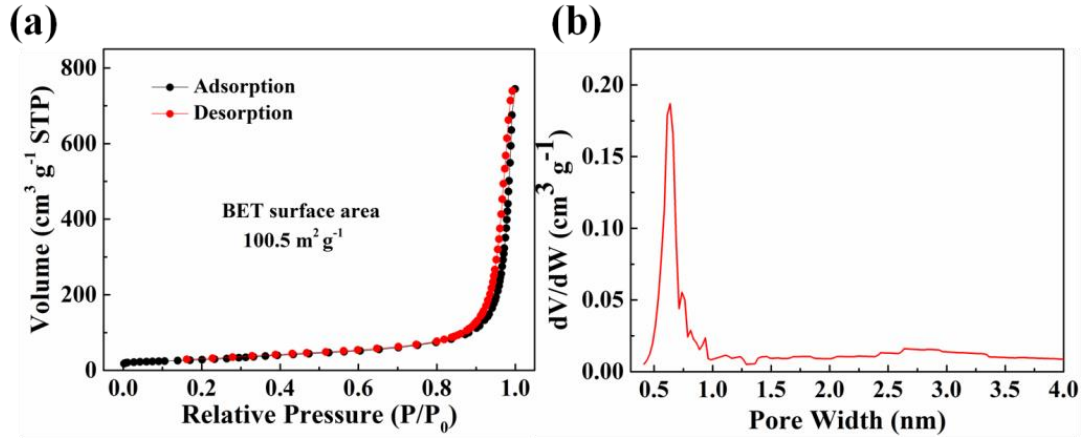

**Figure S3.** N<sub>2</sub> adsorption-desorption isotherms (a) and pore size distribution (b) of CNT powders.

**Table S1** Simulated resistance parameters of cells with different separators.

| Battery Type     | MoO <sub>3</sub> @CNT-PP |                     | CNT-PP             |                     | PP                 |                      |                     |
|------------------|--------------------------|---------------------|--------------------|---------------------|--------------------|----------------------|---------------------|
|                  | R <sub>b</sub> (Ω)       | R <sub>ct</sub> (Ω) | R <sub>b</sub> (Ω) | R <sub>ct</sub> (Ω) | R <sub>b</sub> (Ω) | R <sub>sei</sub> (Ω) | R <sub>ct</sub> (Ω) |
| Fresh Cell       | 4.66                     | 26.65               | 4.99               | 23.92               | 3.56               | -                    | 34.67               |
| After 100 Cycles | 3.77                     | 4.31                | 3.48               | 6.91                | 5.75               | 20.84                | 11.11               |

Based on the calculation method of lithium-ion diffusion coefficient, the equations are shown as below:<sup>1</sup>

$$Z' = R_D + R_L + \sigma\omega^{-1/2} \quad (1)$$

$$D_{Li} = \frac{R^2 T^2}{2A^2 n^4 F^4 C^2 \sigma^2} \quad (2)$$

where  $D_{Li}$  represents the diffusion coefficient of the lithium ion,  $R$  is the gas constant,  $T$  the absolute temperature,  $A$  the surface area of electrode,  $n$  the number of electrons per molecule during oxidization,  $F$  the Faraday constant,  $C$  the concentration of lithium ion, and  $\sigma$  the Warburg factor,  $\sigma$  relates to  $Z'$  and its value can be obtained from the slope of the lines between  $Z'$  and  $\omega^{-1/2}$ .

The low frequency part of the Nyquist plot represents the Warburg impedance related to the lithium ion diffusion.<sup>2</sup> As the electrochemical model of the cell with PP separator is different with the others, we choose low frequency part of EIS results of

the cells with MoO<sub>3</sub>@CNT-PP and CNT-PP after cycling. The relation between  $Z'$  and  $\omega^{-1/2}$  is shown in Fig. R6. After fitting, the cell with MoO<sub>3</sub>@CNT-PP possess a much lower  $\sigma$  value of 21.72 than the cell with CNT-PP with  $\sigma$  value of 140.32. Since it is hard to determine the lithium-ion concentration with the phase change in the sulfur cathode, based on the equation (2), it can be concluded qualitatively that the ion diffusion of the cell with MoO<sub>3</sub>@CNT-PP is quite faster than the cell with CNT-PP.

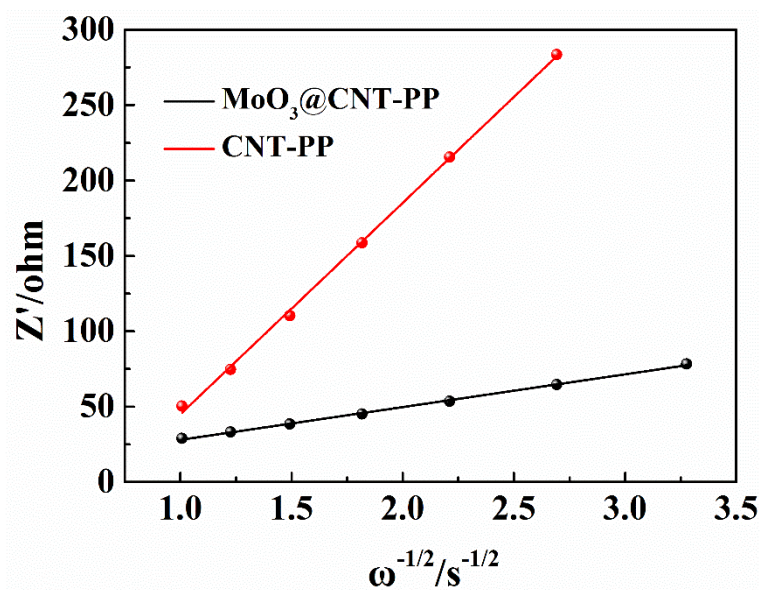

**Fig. S4** Real parts of the complex impedance of cells with MoO<sub>3</sub>@CNT-PP and CNT-PP versus  $\omega^{-1/2}$  after cycling.

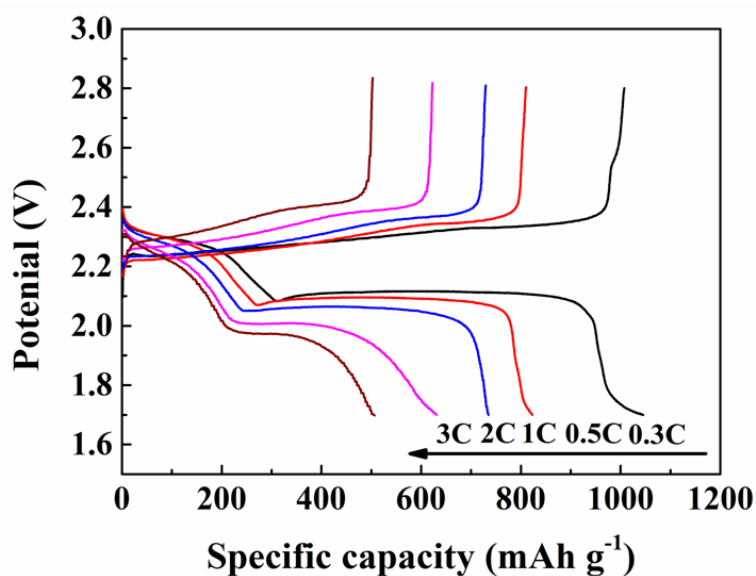

**Figure S5.** Discharge-charge curves of Li-S batteries with CNT-PP separator.

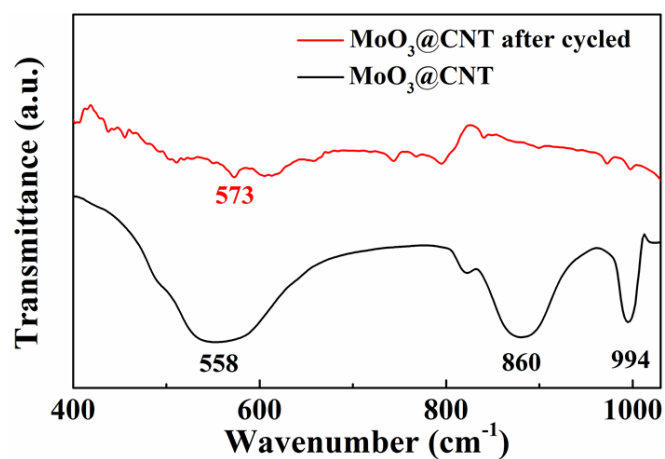

**Figure S6** FT-IR spectra of original MoO<sub>3</sub>@CNT and cycled one in Li-S battery.

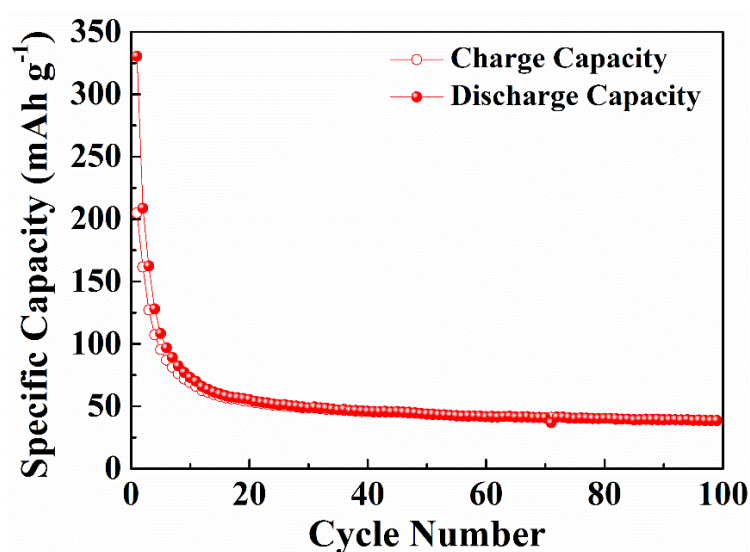

**Figure S7** Cycling performance of the cell using MoO<sub>3</sub>@CNT as the only active material.

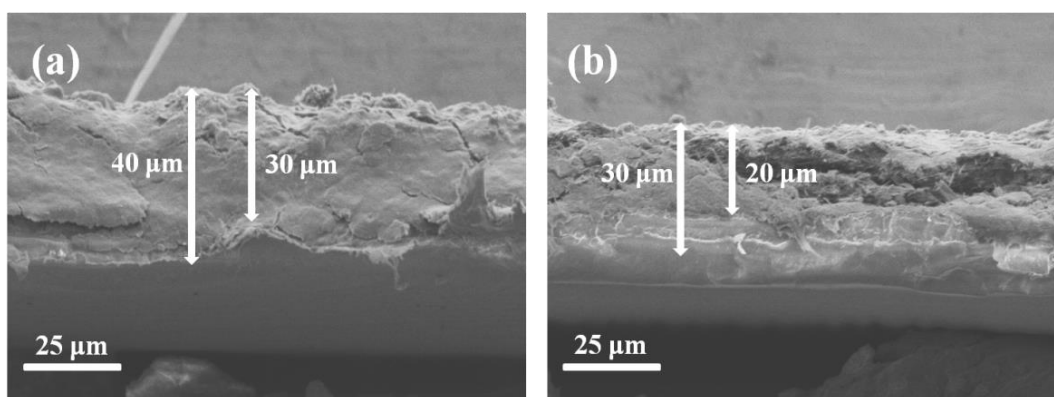

**Figure S8.** Cross-sectional SEM images of modified separators with CNT (a) and MoO<sub>3</sub>@CNT (b) as the coating layers.

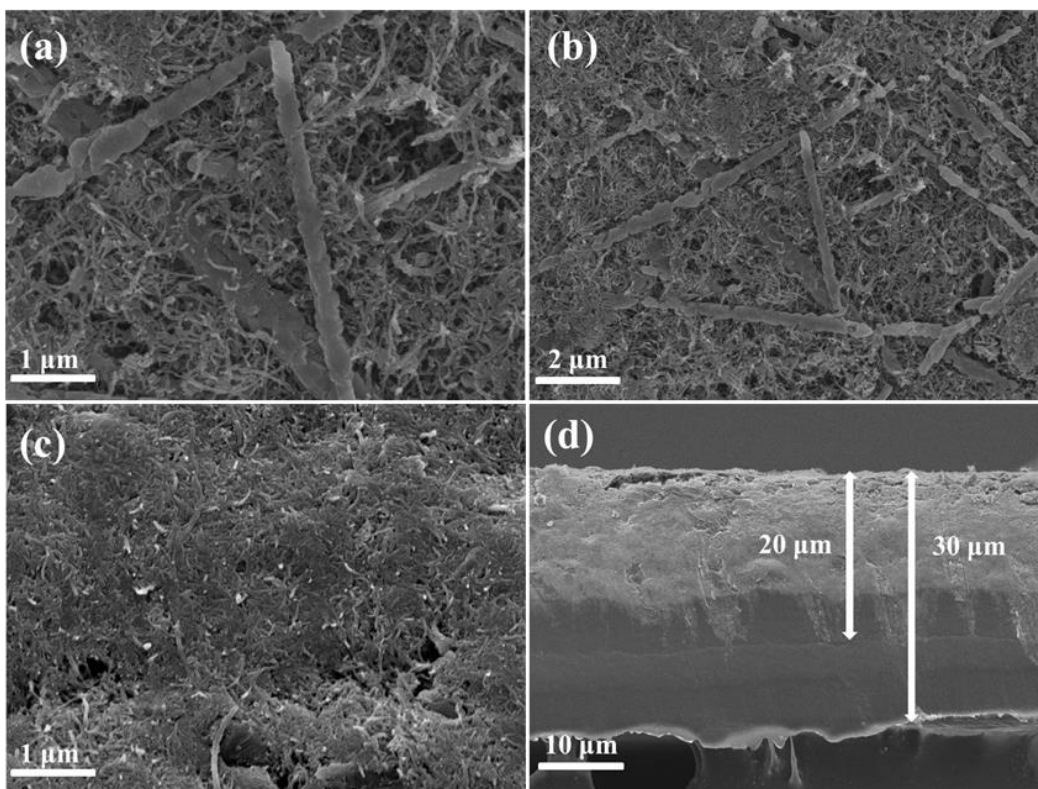

**Figure. S9** SEM images of MoO<sub>3</sub>@CNT-PP separator after cycling: surface morphology (a, b) and cross-sectional structure (c, d).

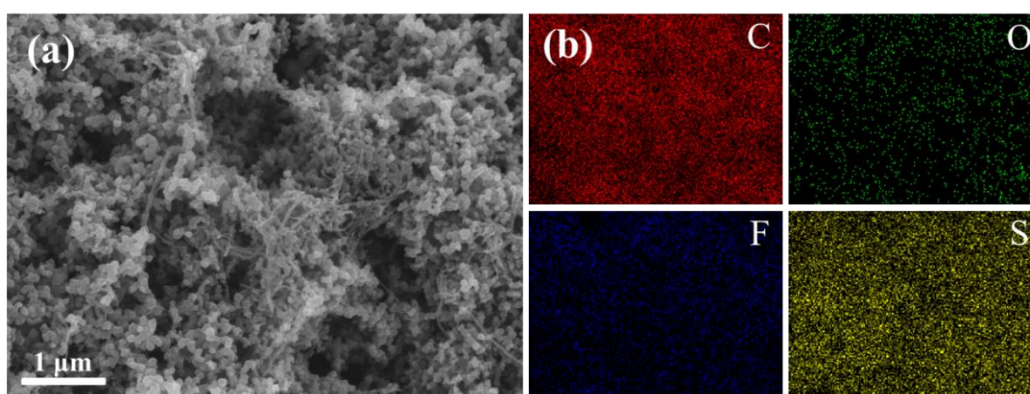

**Figure. S10** SEM image (a) and EDS mapping images (b) of the sulfur cathode after cycling.

## Reference

1. B. Li, C. Han, Y.-B. He, C. Yang, H. Du, Q.-H. Yang and F. Kang, *Energy & Environmental Science*, 2012, **5**, 9595.
